# Supplementary material for: Prevalence and Determinants of Self-Medication Practices among Cardiovascular Patients from Béja, North West Tunisia: A Community-Pharmacy-Based Survey
Source: MDPI journal article supplement (doi:10.3390/pharmacy12020068), 2024-04-12
Supplement: s1 [file s1]

## Form S1

### Pharmacy survey form:

|                                                        |                 |
|--------------------------------------------------------|-----------------|
| Screening date : _ _ / _ _ / _ _<br>No. Subject: ..... | Age : .....     |
| Gender :    Male        Female                         | Language: ..... |

Please complete the following form :

### Questionnaire to assess self-medication practices in cardiovascular patients compared to the general population in a community pharmacy in Tunisia

**Note:** The private information provided in this questionnaire is used to draft a brief and we are grateful for all survey responses. All private and personal data is collected anonymously and will be presented in statistical form. Thank you for your understanding.

#### I. GENERAL INFORMATION:

**1. Marital status :**

☐ Single    ☐ Married    ☐ Widow(er)    ☐ Divorced    ☐ IDK/IDWA

**2. Level of education:**

☐ Primary    ☐ Secondary    ☐ Higher    ☐ Unschooled    ☐ IDK/IDWA

**3. Place of residence:**    ☐ Urban environment    ☐ Rural environment    ☐ IDK/IDWA

**4. Socio-economic level :**

☐ Low    ☐ Medium    ☐ High    ☐ IDK/IDWA

**5. Employment situation:**

☐ employee    ☐ retailer    ☐ farmer  
☐ independent profession    ☐ unemployed    ☐ student  
☐ pensioner    ☐ other (housewife)    ☐ IDK/IDWA

#### II. PERSONAL HABITS :

**6. Do you smoke ?**

☐ current smoker    ☐ non-smoker    ☐ former smoker  
If yes, since when ?.....and how many cigarettes a day ? .....

**7. Do you drink alcohol ?**    ☐ Yes    ☐ No

• If yes, since when ?..... and how many times a week ? .....

### III. PERSONAL PATHOLOGICAL ANTECEDENTS:

#### 8. Do you suffer from cardiovascular diseases?

- ☐ Yes                      ☐ No                      ☐ IDK/IDWA
- If yes, which one? .....

HTA ☐                      Coronary heart disease : ( MI ☐ , angina ☐ )                      AVC ☐  
Atherosclerosis ☐

Lower limb arteriopathy ☐                      Heart failure ☐

Valvulopathy ☐                      Heart rhythm disorders ☐                      Other .....

#### 9. Since when ... ?

☐ one month                      ☐ less than 3 months                      ☐ between 3 months and 1 year

☐ more than 1 year                      ☐ more than 5 years                      ☐ IDK/IDWA

#### 10. Please indicate what other health problems you have :

- ☐ Bronchial asthma                      ☐ BPOC                      ☐ Peptic ulcer disease
- ☐ Dyslipidemia                      ☐ Hypertriglyceridemia
- ☐ Hypercholesterolemia                      ☐ Diabetes mellitus type I                      ☐ Diabetes mellitus type II
- ☐ Hyperthyroidism                      ☐ Obesity                      ☐ Overweight
- ☐ Anxiety                      ☐ Depression                      ☐ Menopause
- ☐ No associated pathology
- ☐ Other pathology ..... ☐ IDK/IDWA

### IV. MEDICATION MANAGEMENT :

#### Please allow me to define what self-medication is:

„ Self-medication is the use of medicines (by the consumer) that are not prescribed by the doctor.”

#### 11. Have you self-medicated in the past six months?

☐ Yes                      ☐ No                      ☐ IDK/IDWA

#### 12. What was the reason for your self-medication?

(You can select multiple choices by ticking (×) the appropriate boxes below)

- ☐ Doctor/clinic far from home                      ☐ Time-saving
- ☐ High Doctor's fees                      ☐ I have an old prescription
- ☐ The doctor is busy with a lot of patients
- ☐ I have medication from family members

- ☐ No trust in the doctor  
☐ Prefers pharmacist's advice  
☐ Other. Explain ..... ☐ IDK/IDWA

**13. For what diseases/symptoms and signs have you self-medicated for in the past six months?** (You can select multiple choices by ticking (x) in the appropriate boxes below)

|                         |                   |                |                      |                         |
|-------------------------|-------------------|----------------|----------------------|-------------------------|
| headache                | migraine          | sore throat    | toothache            | earache                 |
| fever                   | runny nose        | cough          | nausea and vomiting  | gastric burns           |
| acidity                 | stomach pain      | diarrhea       | constipation         | haemorrhoids            |
| insomnia                | joint pain        | muscle pain    | slimming             | menstrual pain          |
| menopause               | conjunctivitis    | dry eyes       | pregnancy prevention | fatigue                 |
| hypertension            | bronchial asthma  | diabetes       | impotence            | urinary tract infection |
| difficulty in urinating | genital infection | varicose veins | hives                | boil/abscess            |

**Other reasons .....**

**14. What are your considerations when choosing a drug for self-medication?**

- ☐ Price      ☐ Pharmaceutical company      ☐ Type of medication

*What type of medication do you choose?*

- ☐ Naturist      ☐ Allopathic  
☐ Homeopathic      ☐ Dietary supplement  
☐ Other. Explain .....

**15. Where do you get your medication for self-medication?**

- ☐ Pharmacy      ☐ Online shopping  
☐ Primary Health Care Centre      ☐ Medical Representatives  
☐ Supermarket      ☐ Station service  
☐ Family/Friends      ☐ IDK/IDWA  
☐ Other .....

**16. Do you check prescription information before self-medicating ?**

- ☐ Yes, always      ☐ No, never      ☐ Yes, sometimes

**17. How do you take these products?**

- ☐ on your own initiative      ☐ on referral from a friend/family  
☐ by renewing a prescription      ☐ according to the TV/Press commercial

**18. Please mention the product you bought? (Fulfill its trade name)**

.....

**19. How long have you been taking this preparation as self-medication?**

- ☐ this is the first time    ☐ less than 3 months    ☐ between 3 months and 1 year  
☐ more than 1 year    ☐ more than 5 years    ☐ IDK/IDWA

**20. What results have you obtained after using these preparations?**

- ☐ complete satisfaction    ☐ low satisfaction  
☐ no results    ☐ side effects

**21. Have you ever experienced adverse effects taking self-medication?**

- ☐ Non    ☐ Yes

• **If yes, explain** .....

**22. What did you do about the adverse effects you experienced ?(the adverse effect(s) refers to question 21)**

- ☐ Going to the private doctor    ☐ Go to the pharmacist  
☐ Going to the hospital    ☐ Stop taking medication  
☐ Other. Explain ..... ☐ Reduce the dose

**23. When did you decide to stop consuming these medicines?**

- ☐ when I finished the box    ☐ in the event of no effect  
☐ if symptoms worsen    ☐ IDK/IDWA  
☐ others. Please explain .....

**24. Are you taking medication for your cardiovascular condition ?**

- ☐ Yes    ☐ No    ☐ IDK/IDWA  
• If yes, which one? .....  
• For which type of pathology? .....

**25. Are you currently taking any other medication ?**

- ☐ Yes    ☐ No    ☐ IDK/IDWA  
• If yes, which one? .....  
• For which type of pathology? .....

**Thank you for your time!**

□ **IDK/IDWA** = don't know / don't want to answer
